# Supplementary material
Source: publisher site journal article supplement (https://www.spandidos-publications.com/678/downloadSupplementary)
Supplement: Supplementary file 1 [file downloadSupplementary]

## Sheet: Sheet1
PRM quantification analysis of peptides
Peptide Sequence	Protein Name	PRM_1	PRM_2	PRM_3	Average	RSD
SSDQPLTVPVSPK	Q9ULW0	10700000	11200000	11800000	11300000	0.0495
LEGGPILPK	Q9ULW0	6140000	5810000	5480000	5810000	0.0572
DPQTPVLQTK	Q9ULW0	4240000	4260000	4500000	4330000	0.034
LSVASTPISQR	A8K4B4	5730000	4800000	5990000	5510000	0.1134
HVDYVADQIVTK	P11388	17400000	17200000	17600000	17400000	0.0131
AANILVGENLVCK	B2RA70	8970000	7920000	7500000	8130000	0.0931
AQFDTLQK	B2RA70	3530000	3750000	4010000	3760000	0.0637
ESADGLQGETQLLVSR	P46013	5720000	5480000	5340000	5510000	0.0345
SPPPESVDTPTSTK	P46013	2610000	2450000	2550000	2540000	0.0316
ELFQTPGHTEEAVAAGK	P46013	5060000	5120000	5030000	5070000	0.009
DLFVELK	O75487	43100000	42800000	47800000	44600000	0.0633
